# Supplementary material
Source: Research Square preprint supplement (doi:10.21203/rs.3.rs-9718241/v1)
Supplement: Supplementary file 1 [file 196c3de5306ad84bb031db60.docx]

Dear Rishikesh Ovhal
Assistant Editor
Discover Life

I would like to inform you that you had set the deadline for submitting the revised version as January 18th. I must inform you that due to the internet outage in Iran, we were unable to submit the article on time. Therefore, we apologize to the journal and ask for your assistance

Kind regards

H.Dashti
