# Supplementary material
Source: Research Square preprint supplement (doi:10.21203/rs.3.rs-9718241/v1)
Supplement: Supplementary file 3 [file 8a9099f4f44c524efa3168e8.docx]

clc;

clear;

close all;

load('wheat3.mat');

inputs=p;

targets=t;

% Create a fitting network

n=8; % Size of hidden layer

% net.Layers{1}.transferfcn='tansig';

net=newff(inputs,targets,n);

% Training parameters

net.trainparam.epochs=500;

net.trainfcn='trainlm';

net.trainparam.showwindow=true;

net.trainparam.show=1;

net.trainparam.time=Inf;

net.trainparam.goal=1e-7;

net.trainparam.max_fail=10;

% Setup division of data for training, validation, testing

net.divideparam.trainratio=70/100;

net.divideparam.valratio=15/100;

net.divideparam.testratio=15/100;

% Performance function

net.performfcn='mse';

% Plots

net.plotfcns={'plotperform','plotregression'};

% Train the network

[net,tr]=train(net,inputs,targets);

% Test the network

outputs=net(inputs);

errors=gsubtract(targets,outputs);

performance=perform(net,targets,outputs);

% Extraction of training, validation and test data

trainInd=tr.trainInd;

trainInputs=inputs(:,trainInd);

trainTargets=targets(:,trainInd);

trainOutputs=outputs(:,trainInd);

trainErrors=trainTargets-trainOutputs;

trainPerformance=perform(net,trainTargets,trainOutputs);

valInd=tr.valInd;

valInputs=inputs(:,valInd);

valTargets=targets(:,valInd);

valOutputs=outputs(:,valInd);

valErrors=valTargets-valOutputs;

valPerformance=perform(net,valTargets,valOutputs);

testInd=tr.testInd;

testInputs=inputs(:,testInd);

testTargets=targets(:,testInd);

testOutputs=outputs(:,testInd);

testErrors=testTargets-testOutputs;

testPerformance=perform(net,testTargets,testOutputs);

% Specific plots

subplot(2,2,1);

plot(outputs,'k');

hold on;

plot(targets,'r:');

legend('Outputs','Targets');

xlabel('Record');

ylabel('Output_Target');

subplot(2,2,2);

e=targets-outputs;

plot(e,'b');

legend('Errors');

subplot(2,2,3);

histfit(e,50);

subplot(2,2,4);

eTest=testTargets-testOutputs;

plot(eTest,'b-o', 'LineWidth',2,'MarkerSize',10);

legend('Test errors');

testME=sum(testTargets-testOutputs)/numel(testTargets);

y=sim(net,p);

errors=gsubtract(t,y);

% veiw network

% view(net);
