# Supplementary material
Source: Research Square preprint supplement (doi:10.21203/rs.3.rs-9718241/v1)

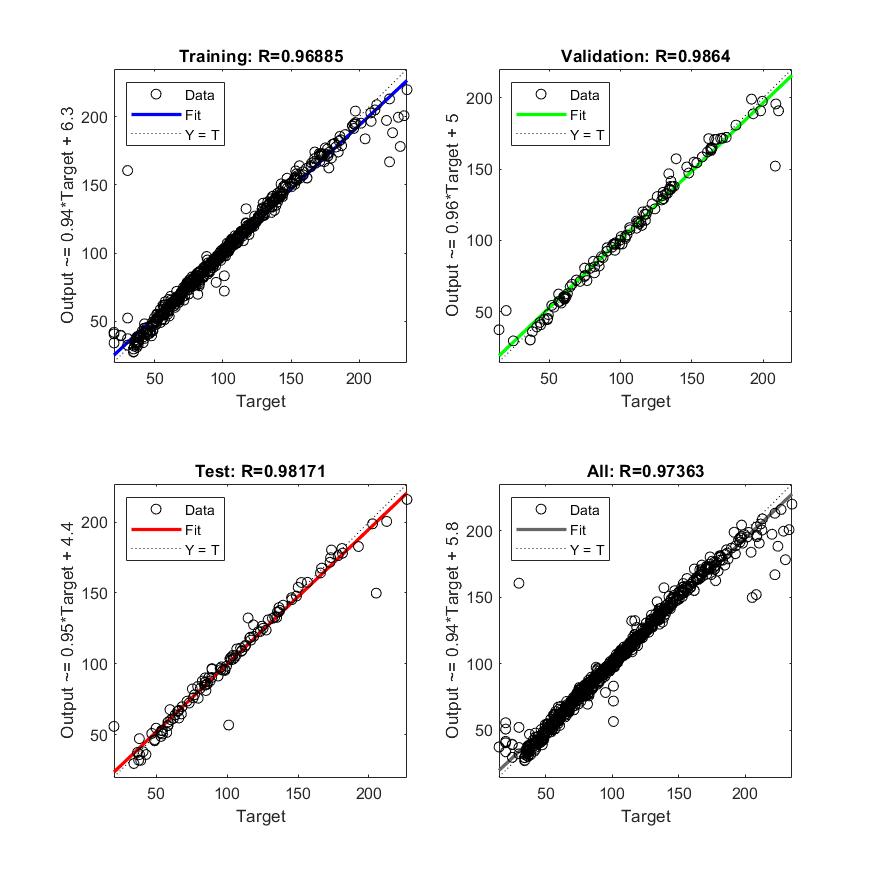

Supplement: Supplementary file 2 [file 317dc2a2adac03691cabf73b.docx]
